# Supplementary material for: Photonic band gap effect and dye-encapsulated cucurbituril-triggered enhanced fluorescence using monolithic colloidal photonic crystals
Source: Royal Society of Chemistry journal article supplement (doi:10.1039/c9nj03328a), 2019-01-01
Supplement: c9nj03328a1.pdf [file c9nj03328a1.pdf]

## Electronic Supplementary Information (ESI)

### Photonic band gap effect and dye encapsulated cucurbituril triggered enhanced fluorescence using monolithic colloidal photonic crystals

Vipin V. V., Parvathy R Chandran, M. R. Animesh, Mohamed A. P. and Saju Pillai\*

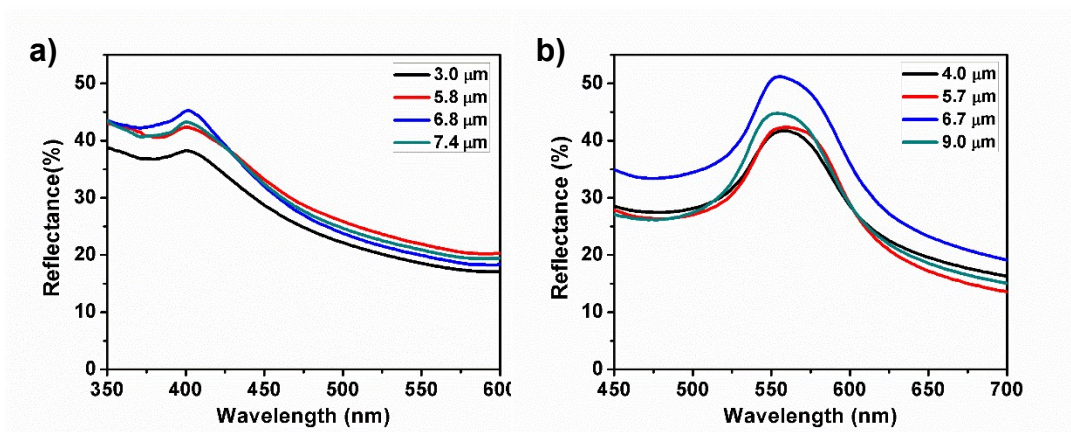

Fig. S1. Reflectance spectra of a) violet and b) green coloured CPC films with different film thickness

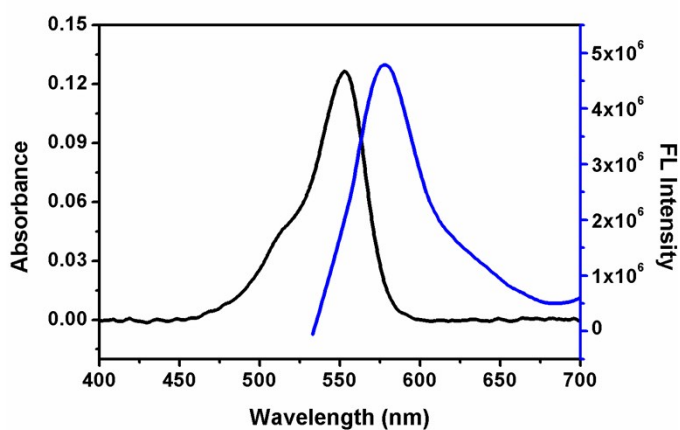

Fig. S2. a) Absorption and b) FL spectra of 10<sup>-6</sup>M aqueous RhB solution

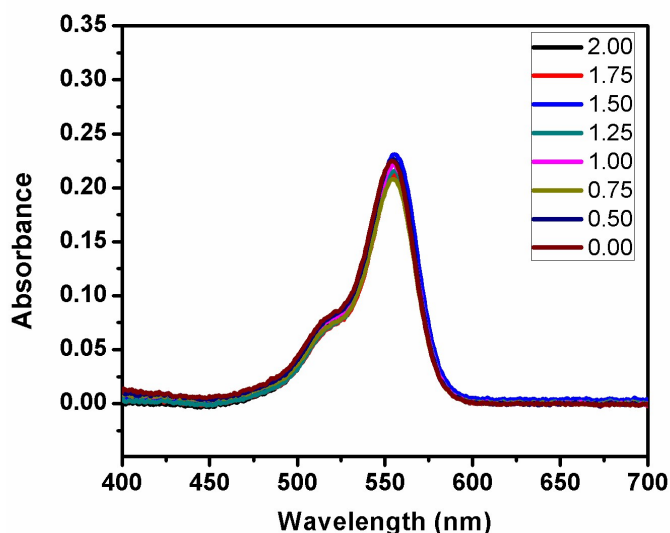

Fig. S3. Absorption spectra of  $10^{-6}$  M aqueous solution of RhB in the presence of various molar ratio of CB7

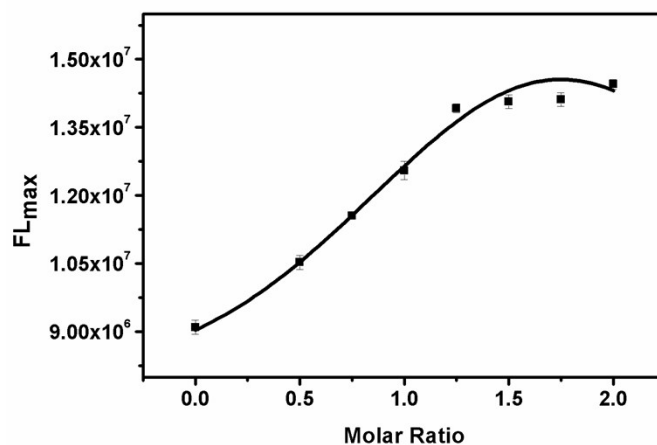

Fig. S4. FL maxima of  $10^{-6}$  M aqueous solution of RhB in the presence of various molar ratio of CB7

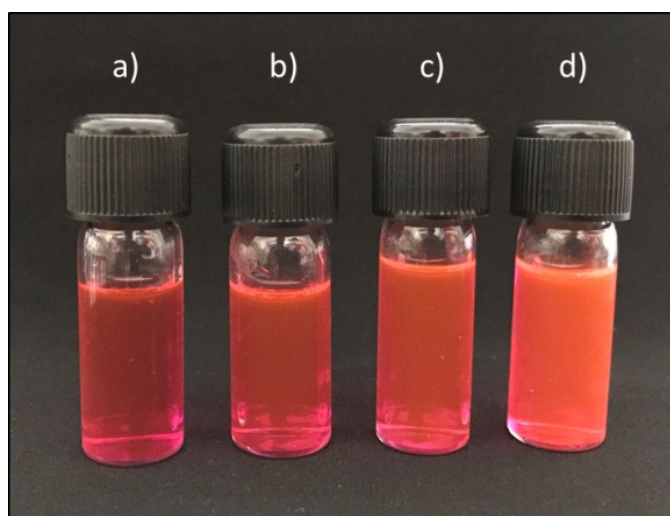

Fig. S5. Digital photographs of aqueous solution of RhB in the presence of various molar ratio of CB7. a) 0 b)0.5, c)1 d)1.5

| Colour of PS CPC | Hydrodynamic Diameter (nm) |
|------------------|----------------------------|
| Violet           | 190                        |
| Green            | 255                        |
| Orange           | 297                        |

Table S1. Hydrodynamic diameter of PS microsphere of violet, green and orange coloured CPCs

| Colour of | Fluorescence |
|-----------|--------------|
|-----------|--------------|

| PS CPC | enhancement factor |
|--------|--------------------|
| Violet | 6                  |
| Green  | 7                  |
| Orange | 10                 |

Table S2. Fluorescence enhancement factor of methylene blue on violet, green and orange coloured CPCs

|                                     | $T_1$ (ns)    | $T_2$ (ns)    | $T_3$ (ns)    | $T_{Av}$ (ns) |
|-------------------------------------|---------------|---------------|---------------|---------------|
| <b>RhB on PS film</b>               | 37.17 (49.92) | 37.01 (50.07) | -             | 37.09         |
| <b>CB-RhB<sub>3</sub>On PS film</b> | 71.36 (37.19) | 75.86 (12.83) | 72.56 (49.98) | 72.52         |

Table S3. Fluorescence life-time  $T_i$ , relative percentage (in parenthesis) and average life-time  $T_{Av}$  of RhB and CB-RhB<sub>3</sub> on planar PS film
